# Supplementary material for: Associations of procalcitonin, C-reaction protein and neutrophil-to-lymphocyte ratio with mortality in hospitalized COVID-19 patients in China
Source: PubMed Central journal article supplement (PMC7490259; doi:10.1038/s41598-020-72164-7), 2020-09-14
Supplement: 41598_2020_72164_MOESM1_ESM.pdf [file 41598_2020_72164_MOESM1_ESM.pdf]

**Associations of procalcitonin, C-reaction protein and Neutrophil-to-Lymphocyte Ratio with mortality in hospitalized COVID-19 patients in China**

Jian-bo Xu <sup>1†</sup>, Chao Xu <sup>2†</sup>, Ru-bing Zhang <sup>3</sup>, Meng Wu <sup>2</sup>, Chang-kun Pan <sup>4</sup>, Xiu-jie Li <sup>5</sup>, Qian Wang <sup>6</sup>, Fang-fang Zeng <sup>7\*</sup>, Sui Zhu <sup>6\*</sup>

<sup>1</sup> Department of Critical Care Medicine, School of Clinical Medicine, Jiamusi University, No.348, Dexiang Street, Jiamusi 154000, Heilongjiang Province, China.

<sup>2</sup> Department of Neurology and Respirator Intensive Care Unit, Heilongjiang Provincial Hospital, No. 82, Zhongshan Road, Harbin 150036, Heilongjiang Province, China.

<sup>3</sup> Department of Cardiology, School of Clinical Medicine, Jiamusi University, No.348, Dexiang Street, Jiamusi 154000, Heilongjiang Province, China.

<sup>4</sup> Department of Critical Care Medicine, Jiamusi Tumor Hospital, No.37, Guanghua Road, Jiamusi 154000, Heilongjiang Province, China.

<sup>5</sup> Department of Respiratory Medicine, Jiamusi Tumor Hospital, No.37, Guanghua Road, Jiamusi 154000, Heilongjiang Province, China.

<sup>6</sup> Department of Medical Statistics, School of Medicine, Jinan University, No.601 Huangpu Road West, Guangzhou 510632, Guangdong Province, China.

<sup>7</sup> Department of Epidemiology, School of Medicine, Jinan University, No.601 Huangpu Road West, Guangzhou 510632, Guangdong Province, China.

**Supplementary Table S1.** Risk factors associated with mortality in patients with COVID-19 by using univariate Cox model analysis

| Variables                                                               | Survival (n=59)  | Death (n=17)      | HR           | 95% CI                   | P                |
|-------------------------------------------------------------------------|------------------|-------------------|--------------|--------------------------|------------------|
| <b>Demographic</b>                                                      |                  |                   |              |                          |                  |
| Age, mean (SD), years                                                   | 57.41 (14.97)    | 65 (11.49)        | 1.03         | 0.99 - 1.07              | 0.149            |
| Sex (male vs female)                                                    | 23 (38.98)       | 7 (41.18)         | 1.14         | 0.43 - 3.01              | 0.786            |
| Time from illness onset to first hospital admission, median (IQR), days | 7 (8)            | 7 (6)             | 0.96         | 0.87 - 1.05              | 0.344            |
| Chronic heart disease (yes vs no)                                       | 6 (10.17)        | 1 (5.88)          | 0.55         | 0.07 - 4.13              | 0.558            |
| Chronic lung disease (yes vs no)                                        | 2 (3.39)         | 0 (0)             | 0            | 0 - Inf <sup>&amp;</sup> | 0.998            |
| Chronic kidney disease (yes vs no)                                      | 4 (6.78)         | 1 (5.88)          | 0.96         | 0.13 - 7.27              | 0.970            |
| Diabetes (yes vs no)                                                    | 9 (15.25)        | 6 (35.29)         | 1.93         | 0.71 - 5.23              | 0.196            |
| Hypertension (yes vs no)                                                | 19 (32.2)        | 8 (47.06)         | 1.60         | 0.62 - 4.18              | 0.333            |
| Cancer (yes vs no)                                                      | <b>1 (1.69)</b>  | <b>2 (11.76)</b>  | <b>4.83</b>  | <b>1.08 - 21.66</b>      | <b>0.040</b>     |
| <b>Clinical symptoms</b>                                                |                  |                   |              |                          |                  |
| Fever (yes vs no)                                                       | 50 (84.75)       | 14 (82.35)        | 0.55         | 0.15 - 1.94              | 0.350            |
| Cough (yes vs no)                                                       | 37 (62.71)       | 12 (70.59)        | 1.3          | 0.45 - 3.73              | 0.626            |
| Headache (yes vs no)                                                    | 2 (3.39)         | 0 (0)             | 0            | 0 - Inf <sup>&amp;</sup> | 0.998            |
| Myodynia (yes vs no)                                                    | 1 (1.69)         | 1 (5.88)          | 3.65         | 0.48 - 27.97             | 0.213            |
| Chills (yes vs no)                                                      | 6 (10.17)        | 2 (11.76)         | 1.18         | 0.27 - 5.22              | 0.823            |
| Nausea and vomiting (yes vs no)                                         | 1 (1.69)         | 1 (5.88)          | 2.70         | 0.36 - 20.57             | 0.337            |
| Chest distress or shortness of breath (yes vs no)                       | 24 (40.68)       | 10 (58.82)        | 2.20         | 0.83 - 5.82              | 0.113            |
| <b>Complications</b>                                                    |                  |                   |              |                          |                  |
| ARDS (yes vs no)                                                        | <b>9 (15.25)</b> | <b>16 (94.12)</b> | <b>39.05</b> | <b>5.16 - 295.25</b>     | <b>&lt;0.001</b> |
| Hypohepatia (yes vs no)                                                 | <b>7 (11.86)</b> | <b>6 (35.29)</b>  | <b>2.86</b>  | <b>1.04 - 7.87</b>       | <b>0.042</b>     |
| Renal insufficiency                                                     | <b>0 (0)</b>     | <b>6 (35.29)</b>  | <b>7.10</b>  | <b>2.6 - 19.36</b>       | <b>&lt;0.001</b> |

|                                         |                      |                       |              |                          |                  |  |
|-----------------------------------------|----------------------|-----------------------|--------------|--------------------------|------------------|--|
| (yes vs no)                             |                      |                       |              |                          |                  |  |
| Heart failure (yes vs no)               | <b>2 (3.39)</b>      | <b>5 (29.41)</b>      | <b>4.77</b>  | <b>1.64 - 13.85</b>      | <b>0.004</b>     |  |
| Shock (yes vs no)                       | <b>3 (5.08)</b>      | <b>12 (70.59)</b>     | <b>14.03</b> | <b>4.90 - 40.18</b>      | <b>&lt;0.001</b> |  |
| <b>Therapy</b>                          |                      |                       |              |                          |                  |  |
| Glucocorticoid (yes vs no)              | 42 (71.19)           | 17 (100)              | 3.02e+8      | 0 - Inf <sup>&amp;</sup> | 0.998            |  |
| Mechanical ventilation (yes vs no)      | 35 (59.32)           | 17 (100)              | 4.22e+8      | 0 - Inf <sup>&amp;</sup> | 0.997            |  |
| Immune globulin (yes vs no)             | 34 (57.63)           | 14 (82.35)            | 3.37         | 0.95 - 11.96             | 0.060            |  |
| <b>Laboratory tests</b>                 |                      |                       |              |                          |                  |  |
| PCT, ng/mL ( $\geq 0.10$ vs $< 0.1$ )   | <b>0.11 (0.18)</b>   | <b>0.25 (0.27)</b>    | <b>12.82</b> | <b>1.68 - 97.8</b>       | <b>0.014</b>     |  |
| CRP, mg/L ( $\geq 52.14$ vs $< 52.14$ ) | <b>16.94 (61.71)</b> | <b>109.58 (126.7)</b> | <b>12.30</b> | <b>2.79 - 54.19</b>      | <b>0.001</b>     |  |
| NLR ( $\geq 3.59$ vs $< 3.59$ )         | <b>5.41 (7.84)</b>   | <b>10.72 (9.67)</b>   | <b>8.6</b>   | <b>1.11 - 66.82</b>      | <b>0.040</b>     |  |

<sup>&</sup> due to the absence of death.

**COVID-19:** coronavirus disease 2019; **HR:** hazard ratio; **95% CI:** confidence interval; **SD:** standard deviation; **IQR:** interquartile range; **ARDS:** acute respiratory distress syndrome; **PCT:** procalcitonin; **CRP:** C-reaction protein; **NLR:** neutrophil-to-lymphocyte ratio.
